# Supplementary material for: Obesity Has a Systemic Effect on Immune Cells in Naïve and Cancer-Bearing Mice
Source: MDPI journal article supplement (doi:10.3390/ijms22168803), 2021-08-16
Supplement: s1 [file s1]

| Anti-mouse antibodies | Fluorophore  | Concentration | Dilution | Clone       | Supplier       |
|-----------------------|--------------|---------------|----------|-------------|----------------|
| CD11b                 | APC          | 0.2mg/mL      | 1:400    | M1/70       | Biolegend      |
| CD11c                 | PE           | 0.2mg/mL      | 1:100    | N418        | Biolegend      |
| CD127                 | PE/CF594     | 0.2mg/mL      | 1:100    | 5B/199      | BD Biosciences |
| CD16/32 (FcR Block™)  | None         | 0.5mg/mL      | 1:200    | 2.4G2       | BD Biosciences |
| CD223 (LAG3)          | PE           | 0.2mg/mL      | 1:100    | C9B7W       | BD Biosciences |
| CD279 (PD-1)          | FITC         | 0.5mg/mL      | 1:100    | 29F.1A12    | Biolegend      |
| CD3                   | BV421        | 0.2mg/mL      | 1:200    | 17A2        | Biolegend      |
| CD3                   | AF700        | 0.5mg/mL      | 1:200    | 500A2       | BD Biosciences |
| CD366 (TIM3)          | APC          | 0.2mg/mL      | 1:100    | RMT3-23     | Biolegend      |
| CD39                  | PE/Cy7       | 0.2mg/mL      | 1:100    | Duha59      | Biolegend      |
| CD4                   | APC/H7       | 0.2mg/mL      | 1:200    | GK1/5       | BD Biosciences |
| CD40                  | PE           | 0.2mg/mL      | 1:200    | 3/23        | Biolegend      |
| CD80                  | Pacific Blue | 0.5mg/mL      | 1:200    | 16-10AI     | Biolegend      |
| CD86                  | PE/Cy7       | 0.2mg/mL      | 1:800    | GL-1        | Biolegend      |
| MHCII                 | APC/Cy7      | 0.2mg/mL      | 1:800    | M5/II4.15.2 | Biolegend      |

|                               |                             |          |       |         |                   |
|-------------------------------|-----------------------------|----------|-------|---------|-------------------|
| <b>CD45R/B220</b>             | PE-CF594                    | 0.2mg/mL | 1:100 | RA3-6B2 | BD<br>Biosciences |
| <b>CD8<math>\alpha</math></b> | AF700                       | 0.5mg/mL | 1:200 | 53-6.7  | Biolegend         |
| <b>Live/Dead</b>              | Zombie Yellow <sup>TM</sup> |          | 1:200 |         | Biolegend         |
| <b>Ly-6C</b>                  | PE/Cy7                      | 0.2mg/mL | 1:400 | HK1.4   | Biolegend         |
| <b>Ly-6G</b>                  | FITC                        | 0.5mg/mL | 1:200 | 1A8     | BD<br>Biosciences |
